# Supplementary material for: CRISPR-Cas9 KO Cell Line Generation and Development of a Cell-Based Potency Assay for rAAV-FKRP Gene Therapy
Source: MDPI journal article supplement (doi:10.3390/cells12202444), 2023-10-12
Supplement: s1 [file s1]

# **CRISPR-Cas9 KO Cell Line Generation and Development of a Cell-Based Potency Assay for rAAV-FKRP Gene Therapy**

**Marine Geoffroy <sup>1,2,\*</sup>, Louna Pili <sup>1,2</sup>, Valentina Buffa <sup>1,2</sup>, Maëlle Caroff <sup>1,2</sup>, Anne Bigot <sup>3</sup>, Evelyne Gicquel <sup>1,2</sup>,  
Grégory Rouby <sup>1,2</sup>, Isabelle Richard <sup>1,2,4</sup> and Romain Fragnoud <sup>1,2,\*</sup>**

<sup>1</sup> Généthon, 91000 Evry-Courcouronnes, France

<sup>2</sup> Université Paris-Saclay/Université Evry, INSERM, Généthon, Integrare Research Unit, UMR\_S951, 91000 Evry, France

<sup>3</sup> Institut de Myologie, Université Pierre et Marie Curie Paris 6, UM76 Univ. Paris 6/U974 UMR7215, CNRS Pitié-Salpêtrière-INSERM, UMRS 974, 75000 Paris, France

<sup>4</sup> Atamyo Therapeutics, F-91000 Evry, France

\* Correspondence: marine.geoffroy@squ-synthena.com (M.G.); rfragnoud@genethon.fr (R.F.);  
Tel.: +33-(0)169471042 (R.F.)

A

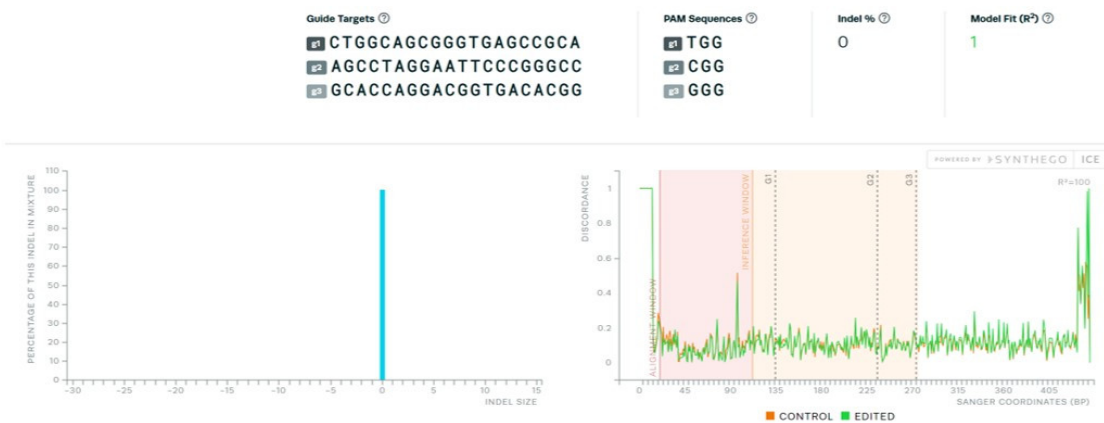

B

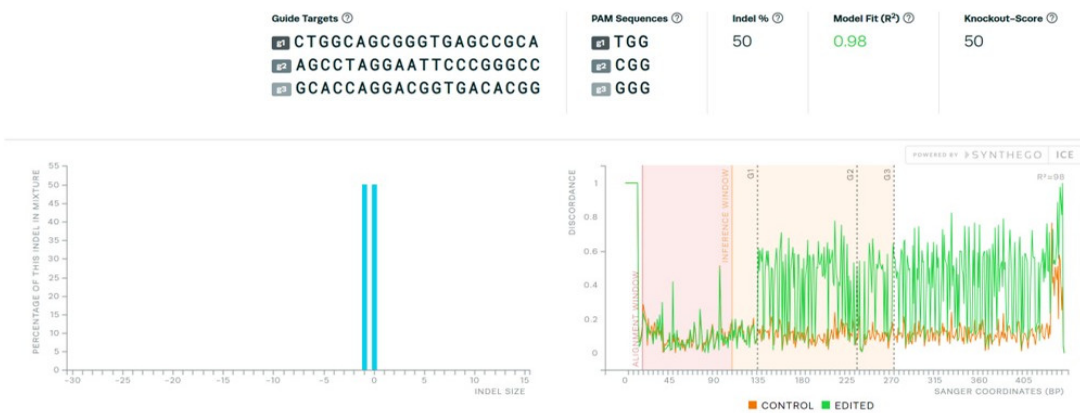

C

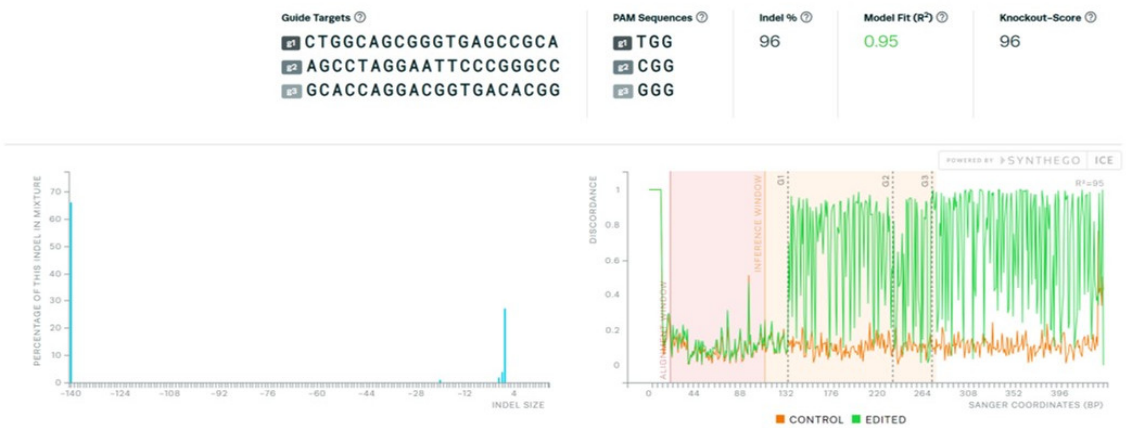

D

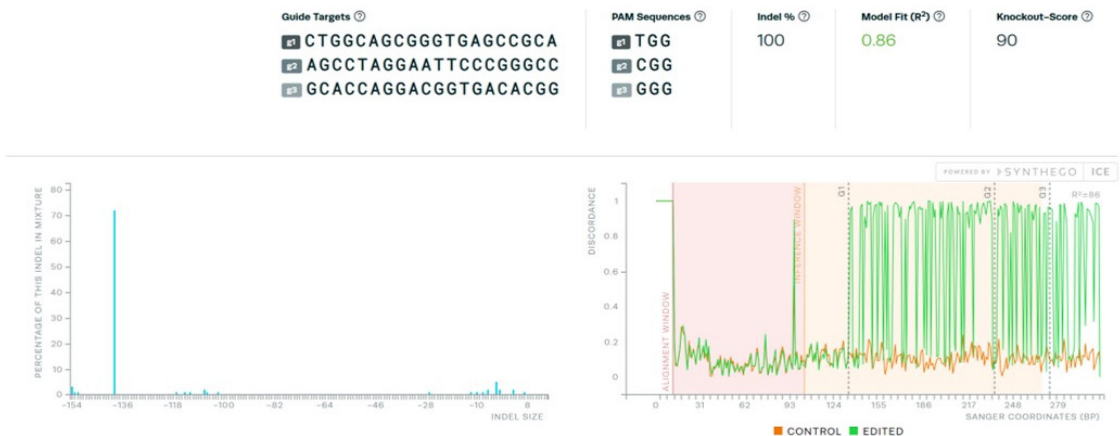

**Figure S1.** Gene editing efficiency and frequency of InDels determined using the ICE Software. **(A)** Representation of InDels in the non-edited wt clones (X/X); Top: sgRNAs sequences used and percentage of InDels for the mixture of sgRNAs. Bottom left: ICE InDels profiles generated by the sgRNAs. Bottom right: Comparison of the reference non-edited sequence (control in orange) and the non-edited wt clone (edited in green). **(B)** Representation of InDels in the edited heterozygous clones (X/A); Top: sgRNAs sequences used and percentage of InDels for the mixture of sgRNAs. Bottom left: ICE InDels profiles generated by the sgRNAs. Bottom right: Comparison of the reference non-edited sequence (control in orange) and the edited heterozygous clone (edited in green). **(C)** Representation of InDels in the edited compound heterozygous clones (A'/A); Top: sgRNAs sequences used and percentage of InDels for the mixture of sgRNAs. Bottom left: ICE InDels profiles generated by the sgRNAs. Bottom right: Comparison of the reference sequence non-edited (control in orange) and the edited compound heterozygous clone (edited in green). **(D)** Representation of InDels in the edited homozygous clones (A/A); Top: sgRNAs sequences used and percentage of InDels for the mixture of sgRNAs. Bottom left: ICE InDels profiles generated by the sgRNAs. Bottom right: Comparison of the reference non-edited sequence (control in orange) and the edited homozygous clone (edited in green).

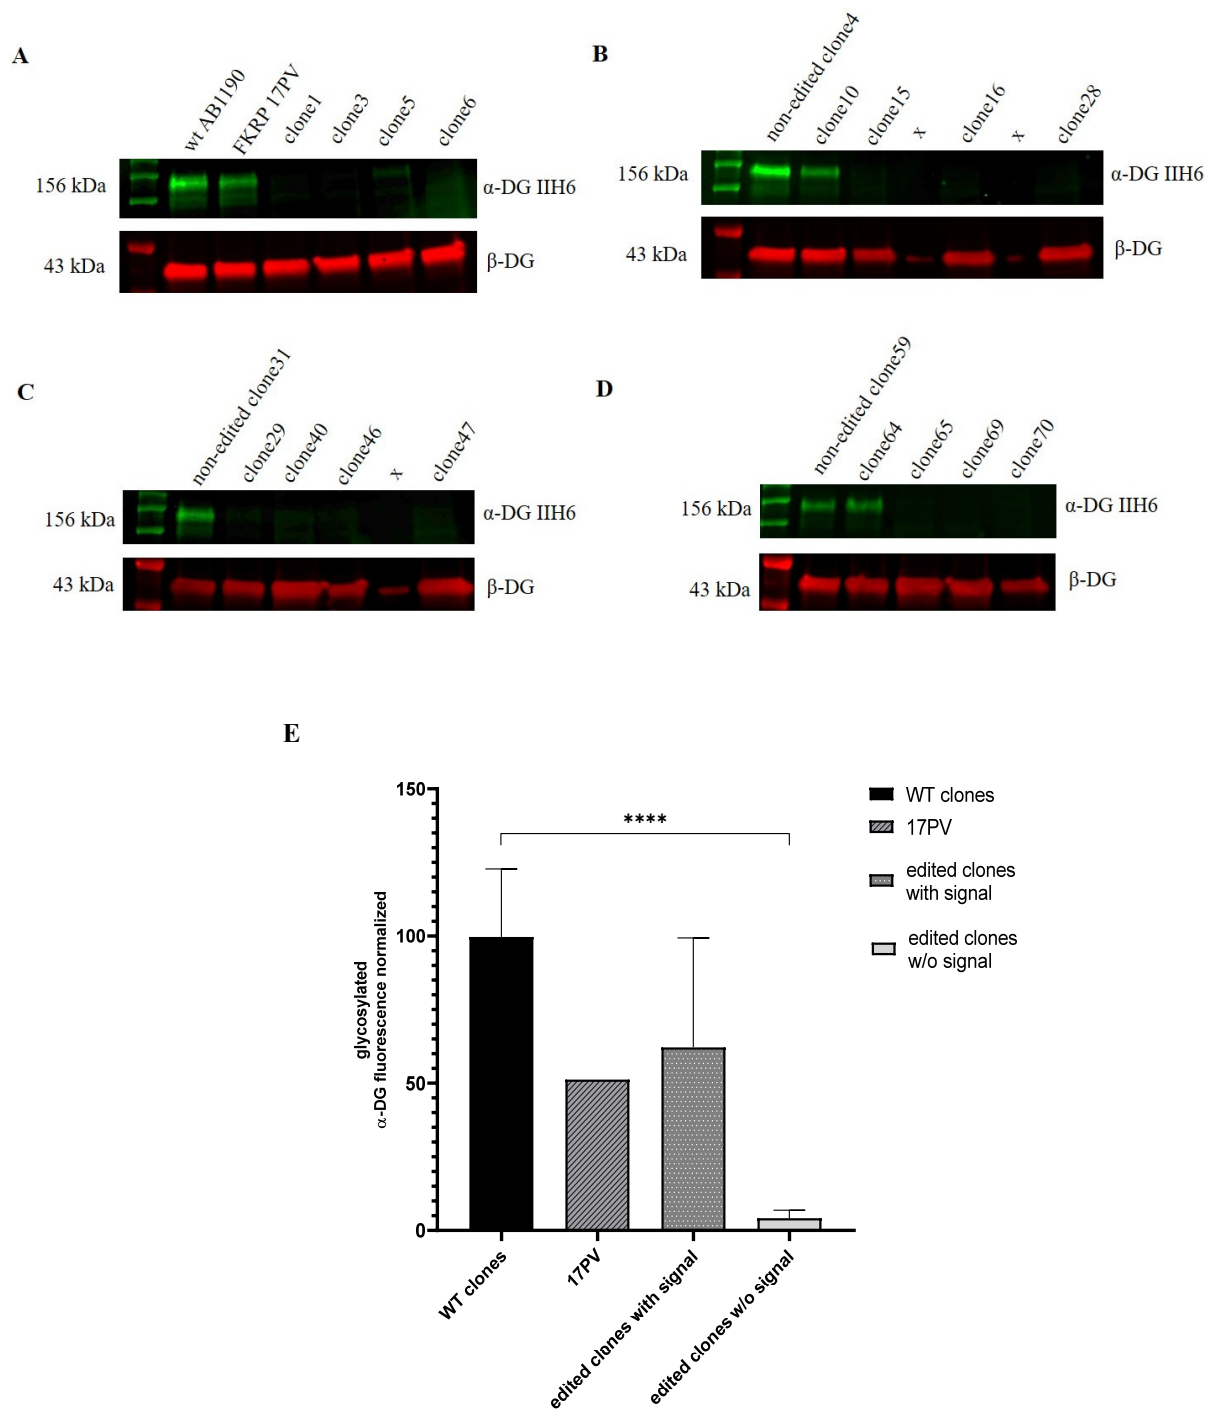

**Figure S2.** Expression of glycosylated  $\alpha$ -DG in the selection of 16 clones. **(A)** Expression of the glycosylated  $\alpha$ -DG using I1H6 antibody by western blot from the original wt myotubes (wt AB1190), the immortalized LGMDR9 patients myotubes (FKRP 17PV), and the edited clones (clone 1, clone 3, clone 5 and clone 6).  $\beta$ -DG was used as housekeeping protein. **(B)** Expression of the glycosylated  $\alpha$ -DG using I1H6 antibody by western blot from the non-edited clone 4 and the edited clones (clone 10, clone 15, clone 16 and clone 28).  $\beta$ -DG was used as housekeeping protein. The "x" corresponds to an empty well. **(C)** Expression of the glycosylated  $\alpha$ -DG using I1H6 antibody by western blot from the non-edited clone 31 and the edited clones (clone 29, clone 40, clone 46 and clone 47).  $\beta$ -DG was used as housekeeping protein. The "x" corresponds to an empty well. **(D)** Expression of the glycosylated  $\alpha$ -DG using I1H6 antibody by western blot from the non-edited clone 59 and the edited clones (clone 64, clone 65, clone 69 and clone 70).  $\beta$ -DG was used as housekeeping protein. **(E)**

Quantification of glycosylated  $\alpha$ -DG normalized in 4 groups: WT/non edited clone (AB1190/clone 4, 31 and 59), FKRP 17PV cell line, edited clones with glycosylated  $\alpha$ -DG signal (clones 5, 10 and 64), edited clones with no glycosylated  $\alpha$ -DG signal (clones 1, 3, 6, 15, 16, 28, 29, 40, 47, 65, 69 and 70). \*\*\*\* p-value < 0.0001 following an unpaired t-test.

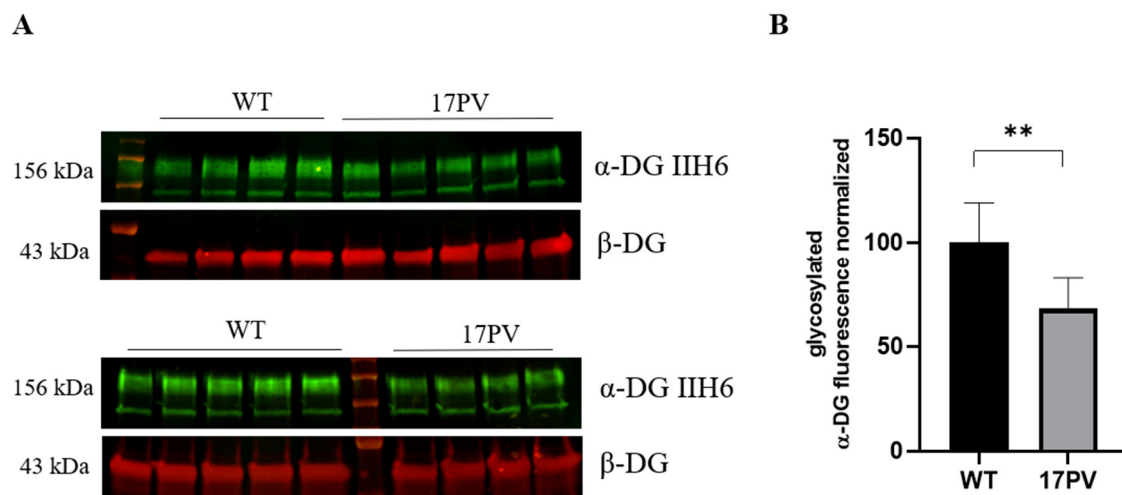

**Figure S3.** Expression of glycosylated  $\alpha$ -DG in WT and FKRP immortalized cell lines. **(A)** Expression of the glycosylated  $\alpha$ -DG using IIH6 antibody by western blot from the original wt myotubes (wt AB1190) and the immortalized LGMDR9 patients myotubes (FKRP 17PV). Two different experiments were performed. **(B)** Quantification and normalization of glycosylated  $\alpha$ -DG normalized (n=9 per cell lines). \*\* p-value = 0.0011 following an unpaired t-test.

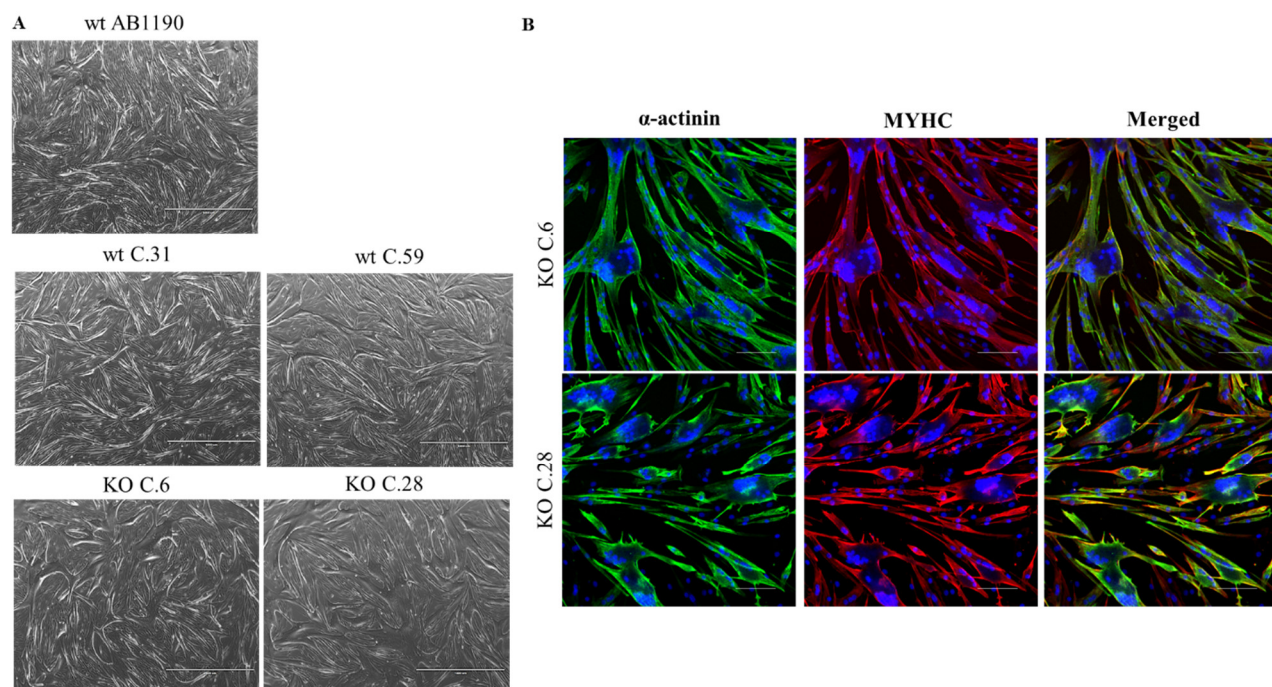

**Figure S4.** Myotube differentiation observed by microscopic analysis and immunofluorescence staining in edited clones. **(A)** Brightfield pictures of the original wt cells (AB1190), the non-edited wt clones (wt C.31 and wt C.59) and the edited wt clones (KO C.6 and KO C.28) at myotube stage. Scale bars = 1,000  $\mu$ m. **(B)** Immunofluorescence staining ( $\alpha$ -actinin and MYHC) of the edited clones (KO C.6 and KO C.28). Cell nuclei were labelled with DAPI dye. Scale bars = 100  $\mu$ m.



**Table S1.** *In silico* analysis of off-targets with CRISPOR TEFOR (A) Top 10 locus of off-targets for sgRNA1. (B) Top 10 locus of off-targets for sgRNA2. (C) Top 10 locus of off-targets for sgRNA3.

| <b>A</b> | Locus                                    | mismatchCount | cfOfftargetScore | chrom        | start           | end             | strand   |
|----------|------------------------------------------|---------------|------------------|--------------|-----------------|-----------------|----------|
|          | <b>FKRP</b>                              | <b>0</b>      | <b>100</b>       | <b>chr19</b> | <b>46755455</b> | <b>46755477</b> | <b>-</b> |
|          | intergenic:RP11-1151B14.2-RP11-1151B14.3 | 4             | 0.51             | chr18        | 56112872        | 56112894        | -        |
|          | intergenic:AL136967.1-RP11-328M4.2       | 3             | 0.46             | chr6         | 41384109        | 41384131        | +        |
|          | intron:ZNF862                            | 4             | 0.40             | chr7         | 149551791       | 149551813       | -        |
|          | intergenic:RP11-128M1.1-TGM3             | 3             | 0.34             | chr20        | 2268800         | 2268822         | +        |
|          | exon:DBNL/PGAM2/AC017116.11              | 4             | 0.34             | chr7         | 44101156        | 44101178        | -        |
|          | intergenic:LMBR1-RNF32                   | 3             | 0.31             | chr7         | 156462214       | 156462236       | +        |
|          | intron:MYO18B                            | 4             | 0.30             | chr22        | 26145944        | 26145966        | +        |
|          | intergenic:RP11-386G21.2-XKR4            | 4             | 0.30             | chr8         | 56083410        | 56083432        | +        |
|          | intergenic:RP11-761N21.1-RP11-520A21.1   | 4             | 0.29             | chr3         | 40950300        | 40950322        | -        |
|          | intergenic:RXRA-RP11-473E2.2             | 4             | 0.28             | chr9         | 137393918       | 137393940       | -        |

  

| <b>B</b> | Locus                              | mismatchCount | cfOfftargetScore | chrom        | start           | end             | strand   |
|----------|------------------------------------|---------------|------------------|--------------|-----------------|-----------------|----------|
|          | <b>FKRP</b>                        | <b>0</b>      | <b>100</b>       | <b>chr19</b> | <b>46755556</b> | <b>46755578</b> | <b>+</b> |
|          | intergenic:CTC-461H2.2-RHPN2       | 4             | 0.71             | chr19        | 33554035        | 33554057        | +        |
|          | intergenic:KCNN3-PMVK              | 3             | 0.67             | chr1         | 154845237       | 154845259       | -        |
|          | lnc:AC006116.17/ZSCAN5A/Y RNA      | 3             | 0.62             | chr19        | 56826681        | 56826703        | +        |
|          | intergenic:RNU7-145P-RP11-142I20.1 | 4             | 0.53             | chr18        | 38950440        | 38950462        | -        |
|          | intergenic:RPS23P3-RNU6-699P       | 4             | 0.50             | chr4         | 67430059        | 67430081        | +        |
|          | lnc:RP11-50E11.2/RP11-50E11.3      | 4             | 0.41             | chr10        | 52397448        | 52397470        | -        |
|          | intron:DFNB31                      | 4             | 0.40             | chr9         | 117170569       | 117170591       | -        |
|          | intergenic:COMP-UPF1               | 4             | 0.39             | chr19        | 18924078        | 18924100        | -        |
|          | exon:C6orf226                      | 4             | 0.33             | chr6         | 42858415        | 42858437        | -        |
|          | exon:CD22                          | 3             | 0.30             | chr19        | 35820497        | 35820519        | +        |

  

| <b>C</b> | Locus                                  | mismatchCount | cfOfftargetScore | chrom        | start           | end             | strand   |
|----------|----------------------------------------|---------------|------------------|--------------|-----------------|-----------------|----------|
|          | <b>FKRP</b>                            | <b>0</b>      | <b>100</b>       | <b>chr19</b> | <b>46755594</b> | <b>46755616</b> | <b>-</b> |
|          | exon:PYGM                              | 4             | 0.57             | chr11        | 64518824        | 64518846        | +        |
|          | intron:RP11-890B15.2                   | 4             | 0.54             | chr11        | 130723063       | 130723085       | -        |
|          | intron:GPR56                           | 4             | 0.39             | chr16        | 57692790        | 57692812        | +        |
|          | intergenic:SNAP25-AS1-SDADIP2          | 4             | 0.37             | chr20        | 10360573        | 10360595        | +        |
|          | intron:AGAP3                           | 3             | 0.33             | chr7         | 150805390       | 150805412       | -        |
|          | intergenic:MDH2-AC005077.14            | 4             | 0.32             | chr7         | 75698884        | 75698906        | +        |
|          | intron:CUX1                            | 4             | 0.31             | chr7         | 101818983       | 101819005       | -        |
|          | intron:AC008271.1                      | 4             | 0.31             | chr2         | 15831614        | 15831636        | -        |
|          | intergenic:RP11-324D17.2-RP11-324D17.1 | 4             | 0.30             | chr16        | 54276113        | 54276135        | -        |
|          | intergenic:VPS37D-DNAJC30/WBSCR22      | 4             | 0.26             | chr7         | 73090050        | 73090072        | +        |
